## **Characterization of functional diversity of the human brain based on intrinsic connectivity networks**

**Running title:** Quantitative estimation of functional diversity of human brain

Congying Chu <sup>a, b</sup>, Lingzhong Fan <sup>a, b</sup>, and Tianzi Jiang <sup>a, b, c, d \*</sup>

<sup>a</sup> Brainnetome Center, Institute of Automation, Chinese Academy of Sciences, Beijing, 100190, China

<sup>b</sup> National Laboratory of Pattern Recognition, Institute of Automation, Chinese Academy of Sciences, Beijing, 100190, China

<sup>c</sup> CAS Center for Excellence in Brain Science and Intelligence Technology, Institute of Automation, Chinese Academy of Sciences, Beijing, 100190, China

<sup>d</sup> Queensland Brain Institute, The University of Queensland, St Lucia, QLD, 4072, Australia

\*Correspondence Address:

Prof. Tianzi Jiang

Brainnetome Center, Institute of Automation, Chinese Academy of Sciences, Beijing, 100190, China

National Laboratory of Pattern Recognition, Institute of Automation, Chinese Academy of Sciences, Beijing, 100190, China

Phone: +86 10 8261 4469 Fax: +86 10 6255 1993

Email: [jiangtz@nlpr.ia.ac.cn](mailto:jiangtz@nlpr.ia.ac.cn)

## 1 **Abstract**

2 Spontaneous fluctuations underlying the brain activity can reflect the intrinsic organization  
3 of the system, such as the functional brain networks. In large scale, a network perspective  
4 has emerged as a new avenue to explore the functional properties of human brain. Here, we  
5 studied functional diversity in healthy subjects based on the network perspective. We  
6 hypothesized that the patterns of participation of different functional networks were related  
7 with the functional diversity of particular brain regions. Independent component analysis  
8 (ICA) was adopted to detect the intrinsic connectivity networks (ICNs) based on the data of  
9 resting-state functional MRI. An index of functional diversity (FD index) was proposed to  
10 quantitatively describe the degree of anisotropic distribution related with participation of  
11 various ICNs. We found that FD index continuously varied across the brain, for example,  
12 the primary motor cortex with low FD value and the precuneus with significantly high FD  
13 value. The FD values indicated the different functional roles of the corresponding brain  
14 regions, which were reflected by the various patterns of participation of ICNs. The FD  
15 index can be used as a new approach to quantitatively characterize the functional diversity  
16 of human brain, even for the changed functional properties caused by the psychiatric  
17 disorders.

18 **Keywords:** functional diversity, ICA, intrinsic connectivity networks.

## 1 **Introduction**

2 The functional organization of human brain involves the coordination of brain regions that  
3 exhibit various functional properties ([Bressler 1995](#); [Bressler and Menon 2010](#); [Felleman](#)  
4 [and Van Essen 1991](#); [Goldmanrakis 1988](#); [Pessoa 2014](#); [Power et al. 2011](#); [Sporns 2013](#),  
5 [2014](#)). Functional diversity of individual brain area is an important kind of property to  
6 systematically understand the large-scale functional organization of human brain. As we  
7 know, some brain regions, such as the primary sensory-motor cortices, are observed to  
8 participate in specialized functions, such as basic sensory and motor functions ([Kanwisher](#)  
9 [2010](#)). In particular, visual system has been deep studied to find several separate regions  
10 exhibiting highly specialized function such as motion, color and object processing  
11 ([Anderson et al. 2013](#); [Kanwisher 2010](#); [Zeki 1993](#)). Meanwhile, there are also brain  
12 regions required by performing multiple cognitive functions. For example, supramarginal  
13 gyrus and middle temporal gyrus are found to be activated across different types of tasks  
14 involved with attention and language production ([Braga et al. 2013](#)). The various level of  
15 functional diversity manifested in human brain reveals the different functional role of brain  
16 region. It has become an increasing concern about how to characterize the functional  
17 diversity involved with different brain regions.

18 Thanks to the advances in neuroimaging techniques, especially the functional MRI (fMRI),  
19 our understanding about functional diversity of human brain has been advanced. Based on  
20 the fast accumulation of task-based fMRI studies, there are some available database with  
21 well-collected details, such as BrainMap and Neurosynth ([Fox et al. 2005](#); [Fox and](#)  
22 [Lancaster 2002](#); [Laird et al. 2005](#); [Yarkoni et al. 2011](#)). Through mining these databases, the  
23 reverse inferences can be drawn to deduce the engagement of particular functions given the  
24 activation in special brain regions ([Poldrack 2006, 2011](#)). Further, the functional diversity or  
25 flexibility across cerebral cortex was estimated based on BrainMap database ([Anderson et al.](#)  
26 [2013](#); [Yeo et al. 2014](#)). The main idea behind these two studies is to map the voxel-wise  
27 pattern of participating in various task domains or cognitive components. However, the  
28 functional diversity estimated from these databases should be considered as a summary

1 based on various task-based studies. As the experimental conditions, including the number  
2 of subjects, the experimental paradigm and the detail about collecting / analyzing data, are  
3 not exactly the same, it is hard to generalize the results to a particular group of subjects or  
4 even to a subject. Based on resting-state fMRI, the overlap of functional networks has been  
5 used as an approach to describe the potential functional heterogeneity of cortical regions  
6 ([Xu et al. 2015](#); [Yeo et al. 2013](#)). However, the number of overlapped functional networks  
7 in brain regions is correlated with the statistical threshold as described by [Xu et al. \(2015\)](#).  
8 Obviously, a strict threshold will lead to little overlap between functional networks. In  
9 addition, the functional diversity reflecting the underlying organization of human brain  
10 should be a considered as a continuous property across the whole brain. It might be  
11 inappropriate to describe the functional diversity using discrete number, such as the number  
12 of functional networks. Further, if we intend to find the change of functional diversity,  
13 supposing the existence of the change, between the healthy subjects and the subjects with  
14 psychiatric disorder, a quantitative characterization of functional diversity is required.  
15 Nevertheless, it is still an open question about how to quantitatively characterize the  
16 functional diversity across the whole brain.

17 In the present study, we sought to provide a frame to characterize the functional diversity  
18 via a quantitative approach. As described by [Bressler and Menon \(2010\)](#), the human brain is  
19 intrinsically organized as functional networks. More remarkable, ICNs detected in  
20 resting-state are generally considered to reflect the networks of brain function, even related  
21 with the task-based co-activation networks ([Sadaghiani and Kleinschmidt 2013](#); [Smith et al.  
22 2009](#); [Spreng et al. 2010](#)). Using the functional networks as the object of study has opened a  
23 new avenue to studies the functional diversity across the cerebral cortex. Based on the  
24 viewpoint of network, we hypothesized that a brain region would present a high level of  
25 functional diversity if the region significantly involved in various ICNs. Therefore, we  
26 proposed the FD index to quantitatively characterize the pattern of participation of various  
27 functional networks across the brain. Through the FD index, we estimated the continuous  
28 distribution of functional diversity from the primary cortex to the high-level association  
29 cortex. The primary cortex was found to significantly participate in some particular ICN.

1 The high-level association cortex was found to involve in multiple ICNs. The FD index  
2 could provide a data-driven estimation about the level of functional diversity, which could  
3 be used to detect the change of functional diversity caused by the psychiatric disorders.

## 4 **Materials and Methods**

5 In this study, the ICA model was applied to 100 high spatiotemporal resolution rfMRI data  
6 from the Human Connectome Project (HCP) ([Van Essen et al. 2013](#)). We proposed to  
7 estimate the functional diversity both in group-level and in subject-level. Here, we focused  
8 on the group-level. More details about the analysis in subject-level would be shown in the  
9 supplementary part. There were four steps in the analysis. First, we adopted  
10 temporal-concatenated spatial ICA to detect the ICNs based on the preprocessed rfMRI data.  
11 Second, we proposed to calculate the index of components homogeneity (CoHo) which  
12 reflected the voxel-wise local consistency that a brain region involved with various ICNs. In  
13 theory, the voxels around the boundary of two functional networks or the boundary of gray /  
14 white matter would show inconsistent patterns of participating in various components,  
15 compared with their neighbors. Third, we used the Gaussian Mixture Model (GMM) to  
16 estimate the distribution of CoHo values across the brain in order to find the brain regions  
17 with high CoHo values. Considering the potential noise and the boundary between  
18 functional networks, we restricted the next-step calculation in these brain regions. Finally,  
19 we proposed the index of functional diversity (FD index) to further describe the pattern of  
20 participation of various ICNs. Fig. 1 gave an overview of the analytic steps.

## 21 **Data acquisition**

22 HCP Q3 data were part of the HCP 500 subjects data released at June 2014  
23 (<http://www.humanconnectome.org/data/>). There were 100 unrelated subjects in this release.  
24 The 100 HCP subjects were between ages 22–35 (mean age was 27.5-31.3; 54 female). As  
25 HCP only provided 5-year age range of each participant, the mean age was also estimated as  
26 a range. During the resting-state scan, subjects underwent two runs of passive fixation (FIX)  
27 in each of two separate sessions. In each session, the phase encoding was in a right to left

1 direction in one run and in a left to right direction in the other run. In this study, we chose  
2 the data in session 1 with the left to right phase encoding. Data were acquired on a Siemens  
3 Skyra 3 Tesla scanner using a customized SC72 gradient insert and a customized body  
4 transmitter coil with 56 cm bore size. Functional data consisted of gradient-echo EPI  
5 sensitive to BOLD contrast. Parameters for the resting data were: TR = 720 ms, TE = 33.1  
6 ms, FA = 52°, 2 × 2 × 2 mm voxels, FOV = 208 × 180 mm, and 72 oblique axial slices  
7 ([Feinberg et al. 2010](#); [Moeller et al. 2010](#); [Setsompop et al. 2012](#); [Van Essen et al. 2012](#);  
8 [Yeo et al. 2013](#)). Each functional data contained 1200 time points, i.e. 14.55 minutes.

### 9 **MRI image preprocessing**

10 To calculate the functional diversity map, we adopted the preprocessed HCP rfMRI data  
11 which were gradient distortion corrected, motion corrected, resampled from the original EPI  
12 frames to MNI space and intensity normalized to mean of 10000. More details about the  
13 preprocessing step could be found in ([Smith et al. 2013](#)). Further, ICA-based artifacts  
14 removed data were provided by HCP. In detail, ICA was run in the high-pass filtered  
15 preprocessed rfMRI data using FSL's MELODIC ([Beckmann et al. 2005](#); [Beckmann and](#)  
16 [Smith 2004](#); [Jenkinson et al. 2012](#); [Smith et al. 2004](#)). Then, the decomposed components  
17 were fed into FIX (FMRIB's ICA-based X-noisifier) which had been trained on HCP data as  
18 an automated component classifier ([Griffanti et al. 2014](#); [Salimi-Khorshidi et al. 2014](#)). The  
19 components would be classified as good and bad components. Bad components were then  
20 removed from the rfMRI data. For the HCP provided rfMRI data, the cleanup was done in a  
21 non-aggressive manner, i.e., only the unique variance associated with the bad components  
22 was removed from the data. The 24 motion parameters derived from the motion estimation  
23 were also regressed out of the data ([Satterthwaite et al. 2013](#)). After these steps, the  
24 ICA-FIX denoised rfMRI volumetric time-series were provided.

25 To determine the functional connectivity pattern of brain regions with different level of  
26 functional diversity, we further processed the ICA-FIX denoised rfMRI data using FMRIB  
27 Software Library (FSL: version 5.0) and Analysis of Functional NeuroImages (AFNI). A

1 series of preprocessing steps were performed: (1) band-pass filtering the time-series (0.01  
2 Hz <  $f$  < 0.1 Hz); (2) regressing the nuisance signals including white matter mean signal,  
3 cerebrospinal fluid mean signal and global mean signal; (3) spatial smoothing the residuals  
4 using 4-mm full-width at half-maximum (FWHM) Gaussian kernel. Here, the resting-state  
5 functional connectivity was based on the Pearson correlation calculated on the processed  
6 rfMRI data. For each subject, the correlation coefficients between the mean time series of  
7 specified brain region and that of each voxel of the whole brain were calculated. These  
8 coefficients were converted to Z-values using Fisher's Z transformation. A one-sample t-test  
9 was adopted to determine the brain regions significantly correlating with the specified brain  
10 region in a voxel-wise manner. Type I errors in multiple comparisons were controlled by the  
11 false discovery rate (FDR).

## 12 **Temporal concatenation group ICA**

13 In the group level, Probabilistic Independent Component Analysis (PICA) was adopted to  
14 decompose the temporally concatenated data of individual subject into different spatial  
15 components (Fig. 1: Stage 1) ([Beckmann et al. 2005](#); [Beckmann and Smith 2004](#)). PICA  
16 decomposed the rfMRI dataset into a linear mixture of spatially independent components  
17 plus Gaussian noise. Probabilistic principal component analysis (PPCA) was used to infer a  
18 set of spatially whitened observations. Then, the noise covariance structure could be  
19 estimated from the residuals after PPCA. The noise was used for transforming the raw ICs  
20 to Z-statistic maps that represented the amount of variability explained by the entire  
21 decomposition at each voxel location relative to the noise ([Beckmann et al. 2005](#)). The high  
22 Z-statistic value illustrated the low probability that the signal in this voxel was generated by  
23 noise. That is, any independent information would have to reveal itself via its derivation  
24 from Gaussianity ([Beckmann et al. 2005](#)). In addition, the ICA decomposition was obtained  
25 using FastICA scheme to optimize for non-Gaussianity source estimates ([Hyvarinen 1999](#)).

26 In the current study, we applied the temporally concatenated PICA via Melodic (Melodic  
27 3.13). The number of independent components was set as 20. The 20-components were

---

1 considered as the lower order that represented large-scale ICNs ([Smith et al. 2009](#)). We also  
2 tried different number of components (30, 40, 50, 60 and 70) to evaluate the functional  
3 diversity map across various orders of ICA. In addition, it was considered as high model  
4 order to set the number of component as 70 that could result in more sub-networks ([Allen et](#)  
5 [al. 2011](#); [Kiviniemi et al. 2009](#)).

## 6 **ICN selection**

7 Before the next step analysis, the components from ICA decomposition should be classified  
8 as corresponding ICNs and artificial non-ICNs. The up-threshold Z-score maps ( $|Z\text{-score}|>5$ )  
9 of components were used as input for the classification. The components classified as ICNs  
10 had the characteristics: 1) focused on cortical structures; 2) clustered voxel groups.  
11 Meanwhile, the components considered as artificial non-ICNs had the features: 1) located at  
12 the borders of the brain; 2) located in cerebrospinal fluid; 3) located at the proximity of  
13 ventricle; 4) located at white matter; 5) dispersedly distributed around the brain without  
14 large clustered voxel. Two viewers (Congying & Lingzhong) selected the components  
15 following the described criteria separately. Only components confidently classified as ICNs  
16 were preserved for the next-step analysis.

## 17 **Component Homogeneity (CoHo)**

18 Before considering the functional diversity across the brain, we firstly defined the CoHo  
19 index to measure the local consistency, i.e., the consistent level of brain regions to participate  
20 across various ICNs. We thought that the functional diversity would reflect underlying  
21 functional organization only in brain regions with high CoHo values. Brain regions with low  
22 CoHo values might reflect the instability of the corresponding signals, such as the effect of  
23 noise. In detail, the CoHo index was defined as:

$$\text{CoHo}_i = \frac{\sum_{j=1}^K \text{corr}(P_i, P_j^i)}{K}$$

24 where  $\text{CoHo}_i$  was the component homogeneity at voxel  $i$  (Fig. 1: Stage 2).  $K$  was the  
25 neighbor voxels around voxel  $i$ .  $K$  could be set as 6, 18 and 26 corresponding to different  
26 definition of neighbor. Here,  $K$  was set as 26 for the nearest neighbor in three-dimensional



1 space.  $P_i$  was the vector composed of Z-scores across the selected ICNs at voxel  $i$ .  $P_j^i$  had  
2 the same definition of  $P_i$ , which was  $j$ th neighbor of voxel  $i$ .  $\text{corr}(*,*)$  was the Pearson  
3 correlation coefficient between two vectors. Then,  $\text{CoHo}_i$  was transformed as  $Z_{\text{CoHo}_i}$   
4 using Fisher's z-transform, which is:

$$Z_{\text{CoHo}_i} = \frac{1}{2} \ln \frac{1 + \text{CoHo}_i}{1 - \text{CoHo}_i}$$

5 where  $\ln(*)$  was the natural logarithm. Here, the transformation was used to extend the scale  
6 of  $\text{CoHo}_i$  for clearly showing the various level of local consistency around the cortex.

## 7 **Gaussian Mixture Model (GMM)**

8 Inspired by Melodic in which GMM was firstly adopted to inference the activation part in  
9 each component ([Beckmann and Smith 2004](#)), we also modeled the distribution of CoHo  
10 values across the brain via GMM. To be noticed, as an alternative to GMM, Melodic had been  
11 changed to use one Gaussian distribution and two Gama distribution to model the Z-scores in  
12 each component referring to ([Hartvig and Jensen 2000](#)). Here, we focused on GMM which  
13 had the form as:

$$p(Z_{\text{CoHo}_i}) = \sum_{l=1}^N \pi_l N(\mu_l, \sigma_l^2)$$

14 where  $\pi_l$  was the mixture coefficient for the  $l$ th Gaussian distribution.  $N(\mu_l, \sigma_l^2)$  was a  
15 Gaussian distribution with mean of  $\mu_l$  and variance of  $\sigma_l^2$ .  $N$  was the number of Gaussian  
16 distribution.  $p(Z_{\text{CoHo}_i})$  was the probability density at the value  $Z_{\text{CoHo}_i}$  which had the  
17 same mean as described above. Using a sufficient number of Gaussian distribution, GMM  
18 could model the probability density function of any input signal ([Bishop 2006](#)). Therefore, an  
19 analytical expression of the distribution of CoHo value could be deduced. The estimation of  
20 the parameters for the model was based on the expectation-maximization (EM) algorithm  
21 ([Bishop 2006](#)). The number of mixed Gaussian distribution was decided by the Bayesian  
22 information criterion ([Schwarz 1978](#)). We thought that the deduced function of mixture  
23 distribution would have peaks and valleys that reflected the underling structure of ICNs.  
24 Some peak could be used as a threshold to generate the brain regions with high values.

## 25 **Functional diversity (FD)**

26 After calculating the CoHo values across the brain, we defined the index of functional  
27 diversity as:

---

$$FD_i = 1 - \frac{\sqrt{N(\sum_{c=1}^N (|Z_i^c| - E(|Z_i|))^2)}}{\sqrt{(N-1)\sum_{c=1}^N (Z_i^c)^2}}$$

1 where  $Z_i^c$  was the Z-scores at the voxel  $i$  within component  $c$ .  $N$  was the number of the  
2 selected components.  $FD_i \in [0, 1]$  was the index of functional diversity at voxel  $i$ . More  
3 specially,  $FD$  was an index that measured the level of anisotropic distribution related with  
4 participation of various components. If a voxel equably participated in each separate ICN,  
5  $FD$  value at this voxel would be calculated as 1. Conversely, if the voxel specifically  
6 participated in only one ICN,  $FD$  value would be 0. To be notice,  $FD$  value would be high at  
7 some voxel with random Z-scores, such as the voxels located in white matter. Therefore, we  
8 emphasized to calculate  $FD$  at brain regions with high CoHo values. These regions were  
9 related with significant signal expression of some ICNs, which were impossible to be mainly  
10 generated by noise or uncertainties in calculating PICA model. In addition, we adopted the  
11 absolute Z-scores for calculating  $FD$  inspired by the inference process in Melodic. By using  
12 Gaussian and Gama distribution, the inference of significant activation or deactivation was  
13 simultaneously modeled as probability in Melodic. The significant activation or deactivation  
14 in some component was related with the derivation from the Gaussian noise. The further the  
15 derivation, the more possible the activation/deactivation obtained information. Therefore, we  
16 used the absolute Z-score to model the extent that a voxel was involved with a particular  
17 component. In other words, we only considered the extent about participation of ICN without  
18 consideration of the positive or negative pattern. After masking the derived functional  
19 diversity map, we spatially smoothed the masked map using 4-mm FWHM Gaussian kernel.  
20 To be notice, the mask adopted here only included the cortical structure. The subcortical  
21 tissues were excluded by using the max-probability atlases with 0.25 probability included in  
22 FSL software (Harvard-Oxford subcortical structural atlases kindly provided by the Harvard  
23 Center for Morphometric Analysis). The cerebellum was excluded based on the probabilistic  
24 MR atlas of the human cerebellum with 0.25 probability ([Diedrichsen et al. 2009](#)).

## 25 Results

26 We here focused on the group-level results based on the group ICA decomposition of 20  
27 components. The results based on subject-level or more model orders were shown in the  
28 supplementary part. In addition, there were some abbreviations for the names of brain  
29 regions used in the following part: temporoparietal junction (TPJ),  
30 parietal-temporal-occipital junction (PTOJ), temporal-occipital junction (TOJ), anterior

1 cingulate cortex (ACC), middle cingulate cortex (MCC), posterior cingulate cortex (PCC),  
2 middle frontal gyrus (MFG), superior frontal gyrus (SFG), inferior parietal lobule (IPL),  
3 superior parietal lobule (SPL), middle temporal gyrus (MTG), dorsolateral frontal cortex  
4 (DLPFC), middle occipital gyrus (MOG), inferior frontal gyrus (IFG).

## 5 **CoHo map and the GMM estimation**

6 Two viewers (Congying & Lingzhong) selected 19 components from 20 decomposed  
7 components as the reflection of underlying ICNs. The non-selected component was related  
8 with signal from white matter. The selected components were shown in Supplemental Fig. 1.  
9 Figure 2 presented the distribution of group-level CoHo and the deduced brain regions with  
10 high CoHo values. The group-level CoHo map without threshold was shown in Fig. 2A  
11 & 2B as surface view and slices separately. Illustratively, regions with evidently high CoHo  
12 value from Fig. 2A mainly included visual cortex (significantly distributed in visual area V1  
13 & V2) and primary sensory-motor cortices. As the related signal had been selected out, the  
14 CoHo values of white matter were significantly low (Fig. 2B). There still were some brain  
15 regions with relatively high CoHo values comparing with ones of white matter. These  
16 regions mainly distributed in association cortex of TPJ and PTOJ, PCC, precuneus and  
17 MFG.

18 The estimation of GMM on the calculated CoHo map was shown in Fig. 2C. According to  
19 the Bayesian information criterion, the number of mixed Gaussian distributions was chosen  
20 as 8. The mixture of these eight Gaussian distributions was shown in Fig. 2C. There were  
21 obvious two peaks and one valley in the estimated density function. We found that the  
22 existence of valley was resulted from the different CoHo values between white matter and  
23 grey matter (Fig. 2A & 2C). In order to define the next-step brain mask with more  
24 confidence, we chose a relatively high threshold that was the CoHo value corresponding to  
25 the last peak location (the red line in Fig. 2C). The location was detected based on the  
26 derivative of the estimated probability density function. The brain regions passing through

1 the threshold were shown in Fig. 2D as slices. We found that the white matter was  
2 significantly excluded.

### 3 **Functional diversity (FD)**

4 We calculated the defined FD index. The results were shown in Fig. 3. As an overview, the  
5 FD index within the derived mask was shown in Fig. 3A. We found that the primary cortex  
6 mainly including visual cortex and primary sensory and motor cortices had low FD values.  
7 The association cortices and higher order association cortices presented high FD values, for  
8 example, precuneus, IPL and TOJ. In order to find the illustrative brain regions with  
9 sufficient low or high FD values, we checked the histogram of the FD values within the  
10 mask (Fig. 3B). We separately chose the brain regions with FD values of top or bottom 5%.  
11 We further adopted a cluster-size correction for the derived brain regions, i.e., only the brain  
12 regions with cluster-size greater than 100 voxels were reserved. The corrected results were  
13 shown in Fig. 3C. The brain regions with significant low FD values were distributed in  
14 visual area V1 & V2 and bilateral postcentral gyrus (left side in Fig. 3C). Meanwhile, there  
15 were brain regions with significant high FD values, which included precuneus, PCC, SFG,  
16 left supramarginal gyrus, left IPL, left MTG and left TOJ (right side in Fig. 3C).

### 17 **Participation of ICNs and functional connectivity**

18 In order to illustrate the underling structures resulting in different FD values, we analyzed  
19 the patterns of participation of ICNs in the brain regions with significant low or high FD  
20 values (just as described above). We adopted probability map of each components  
21 generated by fitting the model of one Gaussian and two Gama distributions. Then, the  
22 participation of ICNs with each brain region was defined as the mean probability of this  
23 region participating in the corresponding component.

24 There were five derived regions with low FD values, which were named as ROI1 to ROI5  
25 (surface view saw in Fig. 4). We showed the fingerprints that were the mean probabilities  
26 participating in different ICNs. We noticed the common feature in these ROIs, which was

---

1 the significant participation (mean probability > 0.5, the light grey circle in Fig.4  
2 corresponding to the probability of 0.5) only involved with some particular ICN. More  
3 specially, ROI1 & ROI2 which were mainly distributed in left /right visual area V1 and V2  
4 were significant participated in independent component 3 (IC3; the red and yellow ROIs in  
5 Fig. 4). All these independent components could be seen in Supplemental Fig. 1. From the  
6 distribution of IC3, we found that up-threshold part of IC3 was mainly shown up in the  
7 central-field representation of left /right visual areas V1 and V2. ROI3 located in primary  
8 visual cortex (V1), which specially showed in IC2 (the green ROI in Fig. 4). IC2 mainly  
9 occupied peripheral V1 and V2. ROI4 & ROI5 were mainly shown up in bilateral  
10 postcentral gyrus, which were significantly related with IC14 (the blue and purple ROIs in  
11 Fig. 4). The up-threshold part of IC14 was mainly located in bilateral postcentral gyrus. We  
12 found that the ICs related with these ROIs almost distributed in special and localized brain  
13 areas.

14 We further calculated the resting-state functional connectivity for these five ROIs to provide  
15 more insights for the properties of these ROIs (Fig. 5). The threshold used for testing the  
16 significance of functional connectivity was set as  $p < 0.001$  (FDR corrected) and  
17 cluster-size > 200 voxels. ROI1 & ROI2 showed positive correlation with each other, and  
18 negative correlation with somatosensory and somatomotor cortex. ROI3 was positively  
19 correlated with bilateral V1, and negatively correlated with the bilateral supramarginal  
20 cortex. ROI4 & ROI5 positively correlated with each other. Some parts of DLPFC were  
21 found to negatively correlate with ROI4 & ROI5.

22 There still were five derived brain regions with high FD values. We used ROI 6 to ROI 10  
23 to name these brain regions. We gave the surface view and the finger-prints of the  
24 ICNs-participation of these ROIs (Fig. 6). We found that the brain regions with high FD  
25 values presented complex patterns of participation of ICNs. These regions significantly  
26 participated in various ICNs. In detail, ROI6, which mainly located in precuneus and PCC,  
27 participated in IC1, 4, 7, 8, 10, 11 and 13 (the yellow ROI in Fig. 6). ROI7 was mainly  
28 shown up in left IPL, which participated in IC5, 6, 7, 8, 10, 13, 18 and 19 (the green ROI in

1 Fig. 6). ROI8 was found in SFG, which had the participation in IC1, 5, 7, 9, 13, 18 and 19  
2 (the blue ROI in Fig. 6). ROI9 was shown up in left MTG, which participated in IC5, 6, 7, 8,  
3 9, 10 and 19 (the red ROI in Fig. 6). ROI10 located in left TOJ, which participated in IC1, 4,  
4 6, 10, 12, 15, 18 and 19 (the orange ROI in Fig. 6). The related ICs were shown in  
5 Supplemental Fig. 1. We found that the ICNs related with these ROIs were pervasively  
6 distributed, rather focused on some localized regions.

7 The pattern of functional connectivity was recognized for these five ROIs with high FD  
8 value. The maps of functional connectivity were shown in Fig. 7, which were corrected on  
9 FDR ( $p < 0.001$ ) and cluster-size ( $> 200$  voxels). More specially, ROI6 presented positive  
10 functional connectivity with its contralateral part, bilateral angular gyrus and MFG. The  
11 negative correlation was shown up in somatosensory and somatomotor cortex and insular.  
12 ROI7 positively correlated with its contralateral part, some part of DLPFC, insular, MTG  
13 and SFG, and, negatively correlated with precuneus, PCC, MFG and bilateral MOG. ROI8  
14 showed positive correlation with SFG, MFG, angular gyrus and some part of DLPFC, and,  
15 negative correlation with precuneus and MOG. ROI9 had positive functional connectivity  
16 with its contralateral region, bilateral IPL and left IFG. The negative functional connectivity  
17 was found in primary visual area, PCC, and MFG. ROI10 showed positive correlation with  
18 its contralateral part, visual cortex, SPL, and precuneus, and, negative correlation with MFG,  
19 ACC, MCC and bilateral angular gyrus.

## 20 **Discussion**

21 In the present study, we utilized the voxel-wise participation of ICNs detected by sICA to  
22 estimate the functional diversity across brain. The CoHo index was firstly defined to decide  
23 the brain regions with homogeneous pattern of participating in various ICNs. Then, the FD  
24 index was calculated within the brain regions decided by CoHo index in a voxel-wise  
25 manner. We further illustrated the detailed fingerprints of participant patterns found in brain  
26 regions with high or low FD values to explore the cause of different FD values.

1 The hypothesis that the organization of human brain function depends on the network  
2 structure among different brain regions is supported by a substantial body of evidence  
3 ([Bressler 1995](#); [Bressler and Menon 2010](#); [M. Mesulam 2009](#); [M. M. Mesulam 1990](#);  
4 [Rubinov and Sporns 2010](#); [Sporns 2013, 2014](#)). The segregation and integration between  
5 brain regions, such as the modular structure and the rich-club organization, have been  
6 estimated by using network model ([Power et al. 2011](#); [Sporns 2013](#); [van den Heuvel and](#)  
7 [Sporns 2011](#); [Yeo et al. 2011](#)). Based on the hypothesis of network, the functional  
8 properties of brain regions, such as functional connectivity and functional co-activation  
9 pattern, within a special network should be more similar than the brain regions located in  
10 different networks. In the perspective of clustering, brain regions attributed to a special  
11 network could be clustered as one cluster using the functional or structural features ([Fan et](#)  
12 [al. 2014](#); [Yeo et al. 2011](#)). The functions related with the specialized network have been  
13 estimated by recent studies ([Laird et al. 2011](#); [Smith et al. 2009](#)). Especially, the  
14 resting-state networks are similar with ‘intrinsic’ functional network architecture presenting  
15 across many tasks ([Braga et al. 2013](#); [Cole et al. 2014](#)). The full repertoire of functional  
16 networks utilized in action of the brain is found to continuously show up at resting-state  
17 ([Smith et al. 2009](#)). So, the function-specialized networks could be found in resting-state.  
18 Based on network perspective, new properties, especially in large scale, have been found in  
19 the functional organization of human brain. For example, Power et al. has proposed to  
20 define the hubs in human brain using the network as object of study, which are different  
21 with the voxel-wise defined hubs ([Power et al. 2013](#)). Braga et al. has estimated the echoes  
22 of brain by using a searchlight approach over the whole brain to find the particular  
23 searchlights involved with multiple functional networks ([Braga et al. 2013](#)). These found  
24 searchlights were believed to contain the echoes of the neural signals from multiple  
25 functional networks. It was supposed that these found searchlights played important roles in  
26 connecting various functional networks. The network perspective maybe opens a new  
27 avenue to further understand the function properties of human brain, especially in large  
28 scale ([Pessoa 2014](#)). We also adopted the network perspective in our study to describe the  
29 large-scale functional diversity of brain regions to some extent.

1 The backbone of our study was the detection of the network structures in human brain. As  
2 we focused on the data from rfMRI, seed-based functional connectivity and ICA-based  
3 decomposition had emerged as two dominant approaches commonly used to detect ICNs  
4 ([Biswal et al. 1997](#); [De Luca et al. 2006](#)). The ICA-based identification of ICNs had been  
5 characterized with high robustness and test-retest reliability ([Damoiseaux et al. 2006](#); [Zuo](#)  
6 [et al. 2010](#)). The estimation of ICNs under a resting condition had been described as a  
7 ‘killer application’ of ICA ([Beckmann 2012](#)). More specially, we adopted the PICA to  
8 estimate the ICNs. The statistically independent source signal was hypothesized to compose  
9 of non-Gaussian signal plus Gaussian noise. Using the process of normalization of  
10 voxel-wise residual noise, the variances of Gaussian noises in different source signals were  
11 normalized as unit variance. The Gaussian/Gamma mixture approach modeled the  
12 normalized Gaussian distribution for the background noise and two Gamma distributions  
13 for the activations and de-activations. So, the voxel-wise Z-statistics in normalized  
14 independent component maps illustrated the extent that the activation in corresponding  
15 voxel was affected by normalized Gaussian noise. For instance, a high Z-statistic value at a  
16 voxel illustrated that the activation at the voxel was barely generated by the Gaussian noise.  
17 It had been proposed that the voxel-wise Z-statistics could be used to illustrate the extent  
18 that the voxel was significantly modulated by the time courses of independent component  
19 ([Beckmann 2012](#)). Therefore, we proposed to use the voxel-wise Z-statistic to measure the  
20 extent that a voxel participated in particular ICN.

21 CoHo index here was proposed to detect the brain regions which consistently participated  
22 in various ICNs. The index was defined in voxel level, which concerned the consistency  
23 between a voxel and its neighboring voxels. The voxel with low regional consistency was  
24 suspected to be affected by the noise of the data or boundary effects, i.e., located in the  
25 boundary of various ICNs. For example, we had observed that the voxels in temporal lobe  
26 and in orbitofrontal cortex had low CoHo values (Fig. 2A). Large bold signal loss in these  
27 regions had been found in other study ([Wig et al. 2014](#)). So, we suspected that the low  
28 CoHo value here was caused by the signal loss. The brain regions with high CoHo values  
29 would attract more interests for the next-step calculation of functional diversity, as these



1 regions reflected the functional properties with more confidence in the current dataset.  
2 Attempting to detect the brain regions with high CoHo values, we adopted the GMM model  
3 to calculate the probability density distribution of the CoHo value. We observed a bimodal  
4 pattern in the distribution (Fig. 2C). The first peak was corresponding to the distribution of  
5 CoHo value in white matter. The second peak was related with the CoHo value in gray  
6 matter. Through CoHo index, we could observe the different properties between white  
7 matter and gray matter. We used the CoHo value corresponding to the second peak as the  
8 threshold to define the brain regions with high CoHo values. In fact, the approach based on  
9 threshold was somewhat arbitrary. We considered this threshold as a strict one, as some part  
10 of gray matter was excluded according to the threshold. We tended to adopt a conservative  
11 threshold to detect the brain regions with consistent participant pattern of ICNs.

12 The functional diversity was described by FD index that was defined as the extent of the  
13 isotropic participation of ICNs. If a brain region participated in various ICNs evenly, this  
14 region would have a high FD value. The brain regions with non-significant participation of  
15 ICNs, such as part of white matter, would have a high FD value, as the Z-statistics in these  
16 regions were mainly affected by Gaussian noise. Therefore, the mask from CoHo map was  
17 adopted to preserve that the FD value was not mainly caused by noise. We observed that the  
18 primary cortex showed lower FD values, such as the sensory and motor cortices. Some part  
19 of association cortex showed much higher FD values. From the selected brain regions that  
20 had significantly low or high FD values, the primary cortex with low FD values only  
21 significantly participated in one ICNs (Fig. 4). The association cortex with high FD values  
22 represented a more complex pattern of participation, which significantly participated in  
23 various ICNs. ICNs detected in resting-state had correspondence with the co-activation  
24 structures found in task state ([Smith et al. 2009](#)). These ICNs are supposed to obtain  
25 functional specialization. In large scale, the brain region with low FD value, i.e., the  
26 participation of unique ICN, might illustrate that the region was related with unique  
27 function. On the other hand, the region involved in various brain functions might participate  
28 in several ICNs. The functional connectivity of these selected regions further validated the  
29 difference function properties between brain regions with low / high FD values. We found

1 that the regions with low FD values mainly had significant functional connectivity with  
2 their contralateral parts. The brain regions with high FD values showed a more distributed  
3 pattern of functional connectivity. It was corresponding with other findings that the  
4 higher-order brain systems obtained long-range functional connectivity ([Sepulcre et al.](#)  
5 [2012](#); [Tomasi and Volkow 2010](#), [2011](#)).

6 In summary, we adopted the perspective of networks to study the functional properties of  
7 human brain in large scale. Our approach allowed us to quantitatively characterize the  
8 degree of the participation of ICNs across the brain by FD index. FD index could be  
9 considered as a potential index to characterize the functional diversity. It was noticed that  
10 the functional diversity changed from primary cortex to high-order association regions  
11 revealed by a quantitative index. In future, a particular interesting application of the FD  
12 index was involved with the application to the psychiatric disorders, such as schizophrenia  
13 which was suspected to be related with disabled integration of various functions.

## 14 **Acknowledgements**

15 This work was partially supported by the National Key Basic Research and Development  
16 Program (973) (Grant No. 2011CB707800) and the Strategic Priority Research Program of  
17 the Chinese Academy of Sciences (Grant No. XDB02030300). Data were provided by the  
18 Human Connectome Project, WU-Minn Consortium (Principal Investigators: David Van  
19 Essen and Kamil Ugurbil; 1U54MH091657) funded by the 16 NIH Institutes and Centers  
20 that support the NIH Blueprint for Neuroscience Research; and by the McDonnell Center  
21 for Systems Neuroscience at Washington University.

---

## 1 **References**

- 2 Allen, E. A., Erhardt, E. B., Damaraju, E., Gruner, W., Segall, J. M., Silva, R. F., et al. (2011). A  
3 baseline for the multivariate comparison of resting-state networks. *Frontiers in systems*  
4 *neuroscience*, 5, 2.
- 5 Anderson, M. L., Kinnison, J., & Pessoa, L. (2013). Describing functional diversity of brain regions  
6 and brain networks. *Neuroimage*, 73, 50-58, doi:10.1016/j.neuroimage.2013.01.071.
- 7 Beckmann, C. F. (2012). Modelling with independent components. *Neuroimage*, 62(2), 891-901,  
8 doi:10.1016/j.neuroimage.2012.02.020.
- 9 Beckmann, C. F., DeLuca, M., Devlin, J. T., & Smith, S. M. (2005). Investigations into resting-state  
10 connectivity using independent component analysis. *Philosophical Transactions of the Royal*  
11 *Society B-Biological Sciences*, 360(1457), 1001-1013, doi:DOI 10.1098/rstb.2005.1634.
- 12 Beckmann, C. F., & Smith, S. A. (2004). Probabilistic independent component analysis for functional  
13 magnetic resonance imaging. *Ieee Transactions on Medical Imaging*, 23(2), 137-152, doi:Doi  
14 10.1109/Tmi.2003.822821.
- 15 Bishop, C. M. (2006). *Pattern recognition and machine learning* (Information science and statistics).  
16 New York: Springer.
- 17 Biswal, B. B., Van Kylen, J., & Hyde, J. S. (1997). Simultaneous assessment of flow and BOLD  
18 signals in resting-state functional connectivity maps. *NMR Biomed*, 10(4-5), 165-170.
- 19 Braga, R. M., Sharp, D. J., Leeson, C., Wise, R. J. S., & Leech, R. (2013). Echoes of the Brain within  
20 Default Mode, Association, and Heteromodal Cortices. *Journal of Neuroscience*, 33(35),  
21 14031-14039, doi:Doi 10.1523/Jneurosci.0570-13.2013.
- 22 Bressler, S. L. (1995). Large-scale cortical networks and cognition. *Brain Res Brain Res Rev*, 20(3),  
23 288-304.
- 24 Bressler, S. L., & Menon, V. (2010). Large-scale brain networks in cognition: emerging methods and  
25 principles. *Trends Cogn Sci*, 14(6), 277-290, doi:10.1016/j.tics.2010.04.004.
- 26 Cole, M. W., Bassett, D. S., Power, J. D., Braver, T. S., & Petersen, S. E. (2014). Intrinsic and  
27 task-evoked network architectures of the human brain. *Neuron*, 83(1), 238-251,  
28 doi:10.1016/j.neuron.2014.05.014.
- 29 Damoiseaux, J. S., Rombouts, S. A., Barkhof, F., Scheltens, P., Stam, C. J., Smith, S. M., et al. (2006).  
30 Consistent resting-state networks across healthy subjects. *Proc Natl Acad Sci U S A*, 103(37),  
31 13848-13853, doi:10.1073/pnas.0601417103.
- 32 De Luca, M., Beckmann, C. F., De Stefano, N., Matthews, P. M., & Smith, S. M. (2006). fMRI resting  
33 state networks define distinct modes of long-distance interactions in the human brain.  
34 *Neuroimage*, 29(4), 1359-1367, doi:10.1016/j.neuroimage.2005.08.035.
- 35 Diedrichsen, J., Balsters, J. H., Flavell, J., Cussans, E., & Ramnani, N. (2009). A probabilistic MR atlas  
36 of the human cerebellum. *Neuroimage*, 46(1), 39-46, doi:10.1016/j.neuroimage.2009.01.045.

- 
- 1 Fan, L., Wang, J., Zhang, Y., Han, W., Yu, C., & Jiang, T. (2014). Connectivity-based parcellation of  
2 the human temporal pole using diffusion tensor imaging. *Cerebral Cortex*, *24*(12), 3365-3378,  
3 doi:10.1093/cercor/bht196.
- 4 Feinberg, D. A., Moeller, S., Smith, S. M., Auerbach, E., Ramanna, S., Gunther, M., et al. (2010).  
5 Multiplexed echo planar imaging for sub-second whole brain fMRI and fast diffusion  
6 imaging. *PLoS One*, *5*(12), e15710, doi:10.1371/journal.pone.0015710.
- 7 Felleman, D. J., & Van Essen, D. C. (1991). Distributed hierarchical processing in the primate cerebral  
8 cortex. *Cerebral Cortex*, *1*(1), 1-47.
- 9 Fox, P. T., Laird, A. R., Fox, S. P., Fox, P. M., Uecker, A. M., Crank, M., et al. (2005). BrainMap  
10 taxonomy of experimental design: description and evaluation. *Hum Brain Mapp*, *25*(1),  
11 185-198, doi:10.1002/hbm.20141.
- 12 Fox, P. T., & Lancaster, J. L. (2002). Opinion: Mapping context and content: the BrainMap model. *Nat*  
13 *Rev Neurosci*, *3*(4), 319-321, doi:10.1038/nrn789.
- 14 Goldmanrakis, P. S. (1988). Topography of Cognition - Parallel Distributed Networks in Primate  
15 Association Cortex. *Annual Review of Neuroscience*, *11*, 137-156, doi:DOI  
16 10.1146/annurev.ne.11.030188.001033.
- 17 Griffanti, L., Salimi-Khorshidi, G., Beckmann, C. F., Auerbach, E. J., Douaud, G., Sexton, C. E., et al.  
18 (2014). ICA-based artefact removal and accelerated fMRI acquisition for improved resting  
19 state network imaging. *Neuroimage*, *95*, 232-247, doi:10.1016/j.neuroimage.2014.03.034.
- 20 Hartvig, N. V., & Jensen, J. L. (2000). Spatial mixture modeling of fMRI data. *Hum Brain Mapp*, *11*(4),  
21 233-248.
- 22 Hyvarinen, A. (1999). Fast and robust fixed-point algorithms for independent component analysis.  
23 *Ieee Transactions on Neural Networks*, *10*(3), 626-634, doi:Doi 10.1109/72.761722.
- 24 Jenkinson, M., Beckmann, C. F., Behrens, T. E., Woolrich, M. W., & Smith, S. M. (2012). Fsl.  
25 *Neuroimage*, *62*(2), 782-790, doi:10.1016/j.neuroimage.2011.09.015.
- 26 Kanwisher, N. (2010). Functional specificity in the human brain: a window into the functional  
27 architecture of the mind. *Proc Natl Acad Sci U S A*, *107*(25), 11163-11170,  
28 doi:10.1073/pnas.1005062107.
- 29 Kiviniemi, V., Starck, T., Remes, J., Long, X., Nikkinen, J., Haapea, M., et al. (2009). Functional  
30 segmentation of the brain cortex using high model order group PICA. *Hum Brain Mapp*,  
31 *30*(12), 3865-3886, doi:10.1002/hbm.20813.
- 32 Laird, A. R., Fox, P. M., Eickhoff, S. B., Turner, J. A., Ray, K. L., McKay, D. R., et al. (2011).  
33 Behavioral interpretations of intrinsic connectivity networks. *J Cogn Neurosci*, *23*(12),  
34 4022-4037, doi:10.1162/jocn\_a\_00077.
- 35 Laird, A. R., Lancaster, J. L., & Fox, P. T. (2005). BrainMap: the social evolution of a human brain  
36 mapping database. *Neuroinformatics*, *3*(1), 65-78.
- 37 Mesulam, M. (2009). Defining neurocognitive networks in the BOLD new world of computed  
38 connectivity. *Neuron*, *62*(1), 1-3, doi:10.1016/j.neuron.2009.04.001.

- 
- 1 Mesulam, M. M. (1990). Large-scale neurocognitive networks and distributed processing for attention,  
2 language, and memory. *Ann Neurol*, 28(5), 597-613, doi:10.1002/ana.410280502.
- 3 Moeller, S., Yacoub, E., Olman, C. A., Auerbach, E., Strupp, J., Harel, N., et al. (2010). Multiband  
4 multislice GE-EPI at 7 tesla, with 16-fold acceleration using partial parallel imaging with  
5 application to high spatial and temporal whole-brain fMRI. *Magn Reson Med*, 63(5),  
6 1144-1153, doi:10.1002/mrm.22361.
- 7 Pessoa, L. (2014). Understanding brain networks and brain organization. *Physics of Life Reviews*, 11(3),  
8 400-435, doi:DOI 10.1016/j.plrev.2014.03.005.
- 9 Poldrack, R. A. (2006). Can cognitive processes be inferred from neuroimaging data? *Trends Cogn Sci*,  
10 10(2), 59-63, doi:10.1016/j.tics.2005.12.004.
- 11 Poldrack, R. A. (2011). Inferring mental states from neuroimaging data: from reverse inference to  
12 large-scale decoding. *Neuron*, 72(5), 692-697, doi:10.1016/j.neuron.2011.11.001.
- 13 Power, J. D., Cohen, A. L., Nelson, S. M., Wig, G. S., Barnes, K. A., Church, J. A., et al. (2011).  
14 Functional network organization of the human brain. *Neuron*, 72(4), 665-678,  
15 doi:10.1016/j.neuron.2011.09.006.
- 16 Power, J. D., Schlaggar, B. L., Lessov-Schlaggar, C. N., & Petersen, S. E. (2013). Evidence for Hubs in  
17 Human Functional Brain Networks. *Neuron*, 79(4), 798-813, doi:DOI  
18 10.1016/j.neuron.2013.07.035.
- 19 Rubinov, M., & Sporns, O. (2010). Complex network measures of brain connectivity: uses and  
20 interpretations. *Neuroimage*, 52(3), 1059-1069, doi:10.1016/j.neuroimage.2009.10.003.
- 21 Sadaghiani, S., & Kleinschmidt, A. (2013). Functional interactions between intrinsic brain activity and  
22 behavior. *Neuroimage*, 80, 379-386, doi:10.1016/j.neuroimage.2013.04.100.
- 23 Salimi-Khorshidi, G., Douaud, G., Beckmann, C. F., Glasser, M. F., Griffanti, L., & Smith, S. M.  
24 (2014). Automatic denoising of functional MRI data: combining independent component  
25 analysis and hierarchical fusion of classifiers. *Neuroimage*, 90, 449-468,  
26 doi:10.1016/j.neuroimage.2013.11.046.
- 27 Satterthwaite, T. D., Elliott, M. A., Gerraty, R. T., Ruparel, K., Loughhead, J., Calkins, M. E., et al.  
28 (2013). An improved framework for confound regression and filtering for control of motion  
29 artifact in the preprocessing of resting-state functional connectivity data. *Neuroimage*, 64,  
30 240-256, doi:10.1016/j.neuroimage.2012.08.052.
- 31 Schwarz, G. (1978). Estimating the dimension of a model. *The annals of statistics*, 6(2), 461-464.
- 32 Sepulcre, J., Sabuncu, M. R., Yeo, T. B., Liu, H. S., & Johnson, K. A. (2012). Stepwise Connectivity of  
33 the Modal Cortex Reveals the Multimodal Organization of the Human Brain. *Journal of*  
34 *Neuroscience*, 32(31), 10649-10661, doi:Doi 10.1523/Jneurosci.0759-12.2012.
- 35 Setsompop, K., Gagoski, B. A., Polimeni, J. R., Witzel, T., Wedeen, V. J., & Wald, L. L. (2012).  
36 Blipped-controlled aliasing in parallel imaging for simultaneous multislice echo planar  
37 imaging with reduced g-factor penalty. *Magn Reson Med*, 67(5), 1210-1224,  
38 doi:10.1002/mrm.23097.

- 
- 1 Smith, S. M., Beckmann, C. F., Andersson, J., Auerbach, E. J., Bijsterbosch, J., Douaud, G., et al.  
2 (2013). Resting-state fMRI in the Human Connectome Project. *Neuroimage*, *80*, 144-168,  
3 doi:10.1016/j.neuroimage.2013.05.039.
- 4 Smith, S. M., Fox, P. T., Miller, K. L., Glahn, D. C., Fox, P. M., Mackay, C. E., et al. (2009).  
5 Correspondence of the brain's functional architecture during activation and rest. *Proceedings*  
6 *of the National Academy of Sciences of the United States of America*, *106*(31), 13040-13045,  
7 doi:DOI 10.1073/pnas.0905267106.
- 8 Smith, S. M., Jenkinson, M., Woolrich, M. W., Beckmann, C. F., Behrens, T. E. J., Johansen-Berg, H.,  
9 et al. (2004). Advances in functional and structural MR image analysis and implementation as  
10 FSL. *Neuroimage*, *23*, S208-S219, doi:10.1016/j.neuroimage.2004.07.051.
- 11 Sporns, O. (2013). Network attributes for segregation and integration in the human brain. *Curr Opin*  
12 *Neurobiol*, *23*(2), 162-171, doi:10.1016/j.conb.2012.11.015.
- 13 Sporns, O. (2014). Contributions and challenges for network models in cognitive neuroscience. *Nat*  
14 *Neurosci*, *17*(5), 652-660, doi:10.1038/nn.3690.
- 15 Spreng, R. N., Stevens, W. D., Chamberlain, J. P., Gilmore, A. W., & Schacter, D. L. (2010). Default  
16 network activity, coupled with the frontoparietal control network, supports goal-directed  
17 cognition. *Neuroimage*, *53*(1), 303-317, doi:10.1016/j.neuroimage.2010.06.016.
- 18 Tomasi, D., & Volkow, N. D. (2010). Functional connectivity density mapping. *Proc Natl Acad Sci U S*  
19 *A*, *107*(21), 9885-9890, doi:10.1073/pnas.1001414107.
- 20 Tomasi, D., & Volkow, N. D. (2011). Functional connectivity hubs in the human brain. *Neuroimage*,  
21 *57*(3), 908-917, doi:10.1016/j.neuroimage.2011.05.024.
- 22 van den Heuvel, M. P., & Sporns, O. (2011). Rich-Club Organization of the Human Connectome.  
23 *Journal of Neuroscience*, *31*(44), 15775-15786, doi:Doi 10.1523/Jneurosci.3539-11.2011.
- 24 Van Essen, D. C., Smith, S. M., Barch, D. M., Behrens, T. E., Yacoub, E., Ugurbil, K., et al. (2013). The  
25 WU-Minn Human Connectome Project: an overview. *Neuroimage*, *80*, 62-79,  
26 doi:10.1016/j.neuroimage.2013.05.041.
- 27 Van Essen, D. C., Ugurbil, K., Auerbach, E., Barch, D., Behrens, T. E., Bucholz, R., et al. (2012). The  
28 Human Connectome Project: a data acquisition perspective. *Neuroimage*, *62*(4), 2222-2231,  
29 doi:10.1016/j.neuroimage.2012.02.018.
- 30 Wig, G. S., Laumann, T. O., & Petersen, S. E. (2014). An approach for parcellating human cortical  
31 areas using resting-state correlations. *Neuroimage*, *93 Pt 2*, 276-291,  
32 doi:10.1016/j.neuroimage.2013.07.035.
- 33 Xu, J., Calhoun, V. D., Worhunsky, P. D., Xiang, H., Li, J., Wall, J. T., et al. (2015). Functional network  
34 overlap as revealed by fMRI using sICA and its potential relationships with functional  
35 heterogeneity, balanced excitation and inhibition, and sparseness of neuron activity. *PLoS*  
36 *One*, *10*(2), e0117029, doi:10.1371/journal.pone.0117029.
- 37 Yarkoni, T., Poldrack, R. A., Nichols, T. E., Van Essen, D. C., & Wager, T. D. (2011). Large-scale  
38 automated synthesis of human functional neuroimaging data. *Nat Methods*, *8*(8), 665-670,  
39 doi:10.1038/nmeth.1635.

- 
- 1 Yeo, B. T., Krienen, F. M., Chee, M. W., & Buckner, R. L. (2013). Estimates of segregation and overlap  
2 of functional connectivity networks in the human cerebral cortex. *Neuroimage*, *88C*, 212-227,  
3 doi:10.1016/j.neuroimage.2013.10.046.
- 4 Yeo, B. T., Krienen, F. M., Eickhoff, S. B., Yaakub, S. N., Fox, P. T., Buckner, R. L., et al. (2014).  
5 Functional Specialization and Flexibility in Human Association Cortex. *Cerebral Cortex*,  
6 doi:10.1093/cercor/bhu217.
- 7 Yeo, B. T., Krienen, F. M., Sepulcre, J., Sabuncu, M. R., Lashkari, D., Hollinshead, M., et al. (2011).  
8 The organization of the human cerebral cortex estimated by intrinsic functional connectivity.  
9 *J Neurophysiol*, *106*(3), 1125-1165, doi:10.1152/jn.00338.2011.
- 10 Zeki, S. (1993). *A vision of the brain*. Oxford ; Boston: Blackwell Scientific Publications.
- 11 Zuo, X. N., Kelly, C., Adelstein, J. S., Klein, D. F., Castellanos, F. X., & Milham, M. P. (2010).  
12 Reliable intrinsic connectivity networks: test-retest evaluation using ICA and dual regression  
13 approach. *Neuroimage*, *49*(3), 2163-2177, doi:10.1016/j.neuroimage.2009.10.080.

14

15

16

## 1 Figure legends

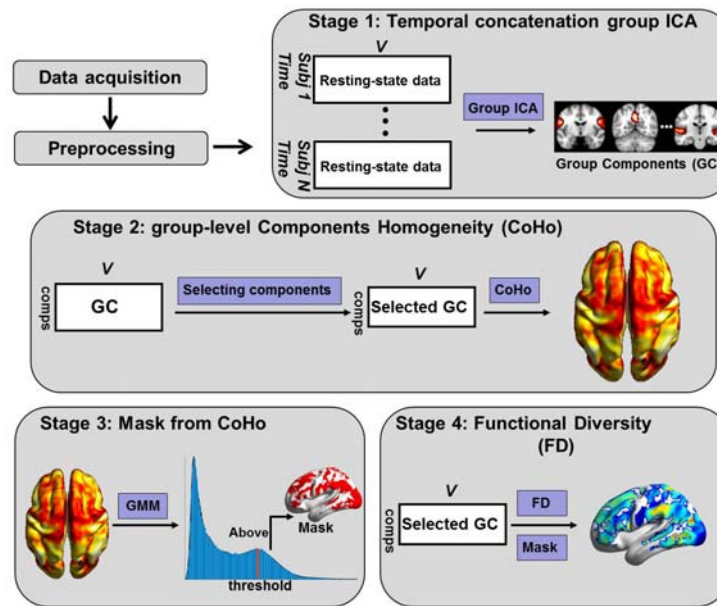

2

3 **Fig 1. Schematic representation of the analytic steps for calculating the FD index. GMM**

4 was the abbreviation of Gaussian Mixture modeling.

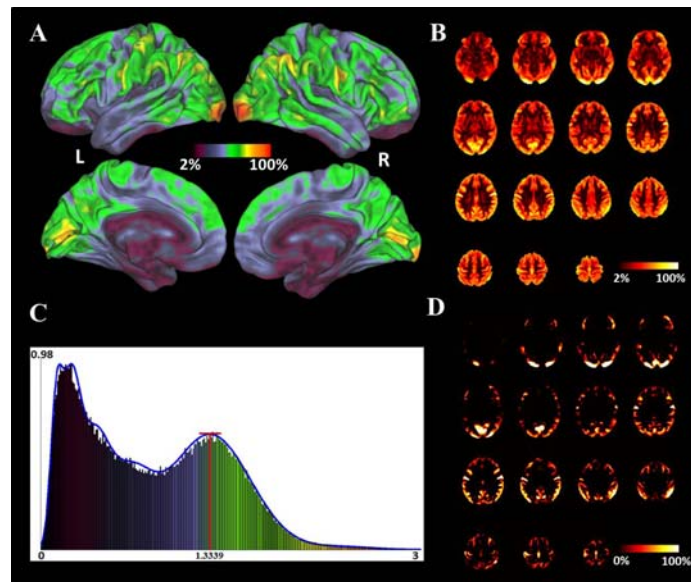

5

6 **Fig 2. The group-level CoHo map and the GMM estimation. (A)** The group-level CoHo map

7 projected on surface. **(B)** The transverse slices of group-level CoHo map. **(C)** The estimation of

8 GMM. The blue curve was the Gaussian mixture function to model the underlying probability



1 density function. The chromatic histogram was derived from the CoHo map. The color here was  
2 corresponding to the color on Fig.2A. The red line was the chosen threshold. (D) The transverse  
3 slices of the brain regions with CoHo values greater than the threshold.

4

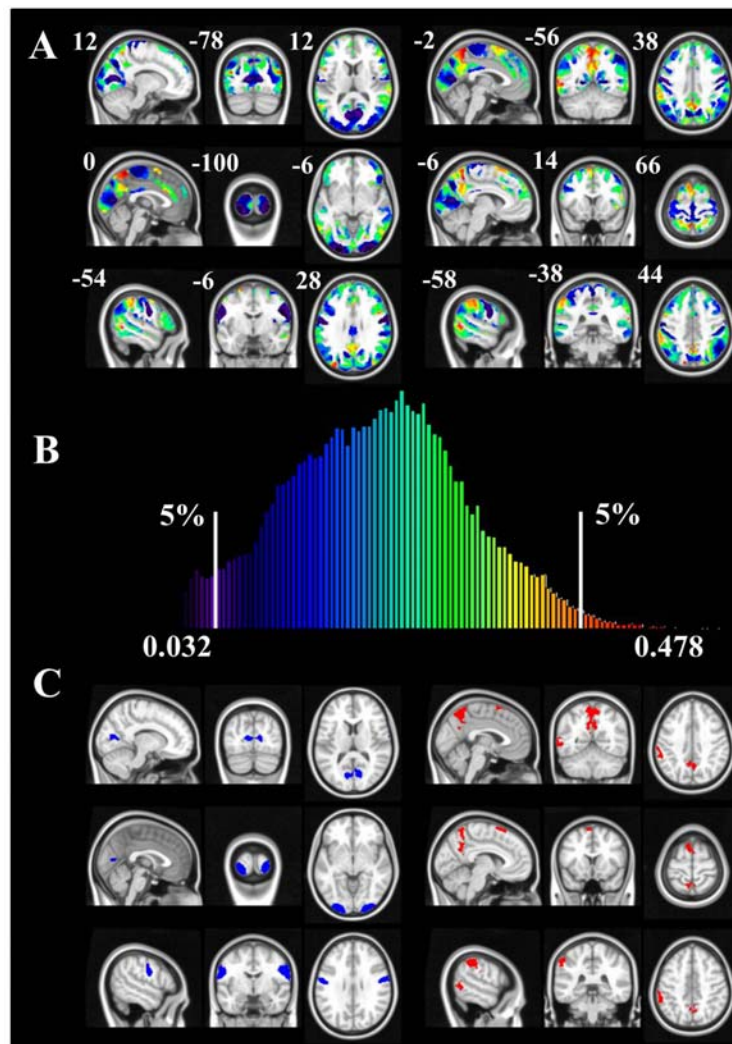

5

6 **Fig 3. The distribution of FD index.** (A) The derived FD index within mask. (B) The  
7 histogram of FD index. The color in the histogram was corresponding to the color on Fig.3A.  
8 (C) The significant brain regions with low or high FD values. The blue regions in left side  
9 were corresponding to low FD values. The red regions in right side were corresponding to  
10 high FD values.

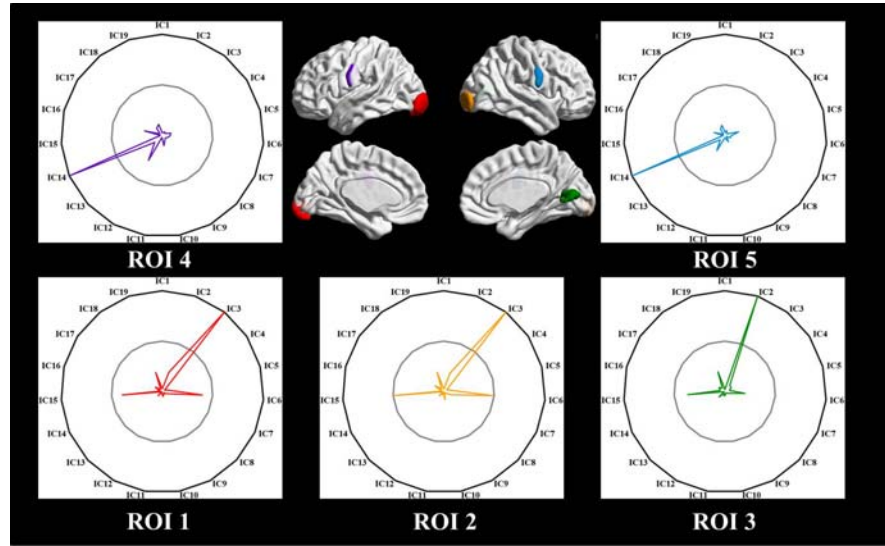

**Fig 4. The pattern of ICNs-participation for the derived brain regions with low FD values.**

The color of the brain region on the surface was corresponding with the color in the fingerprint. We named the brain regions as ROI1 (red), ROI2 (yellow), ROI3 (green), ROI4 (purple) and ROI5 (blue). The grey circle in the fingerprint represented the probability of 0.5. The black circle represented the probability of 1.

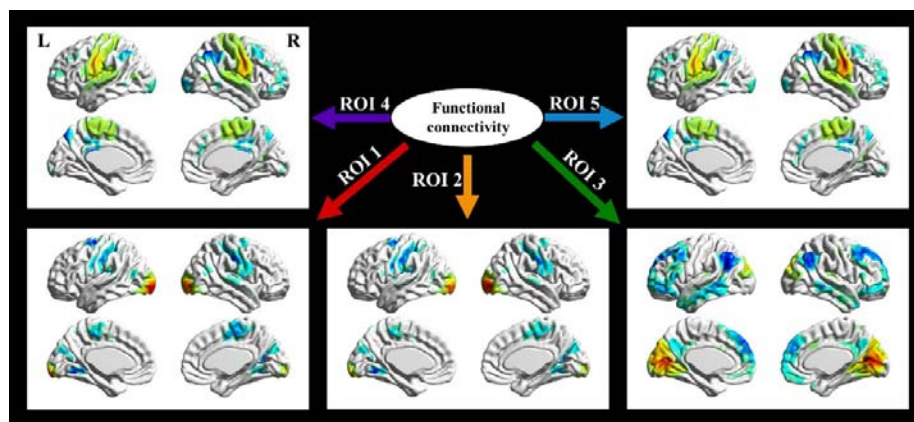

**Fig 5. The pattern of functional connectivity for the five ROIs with low FD value. One**

sample t-test was adopted to test the significance of the functional connectivity with FDR-correction at  $p < 0.001$  and cluster-size  $> 200$  voxels.

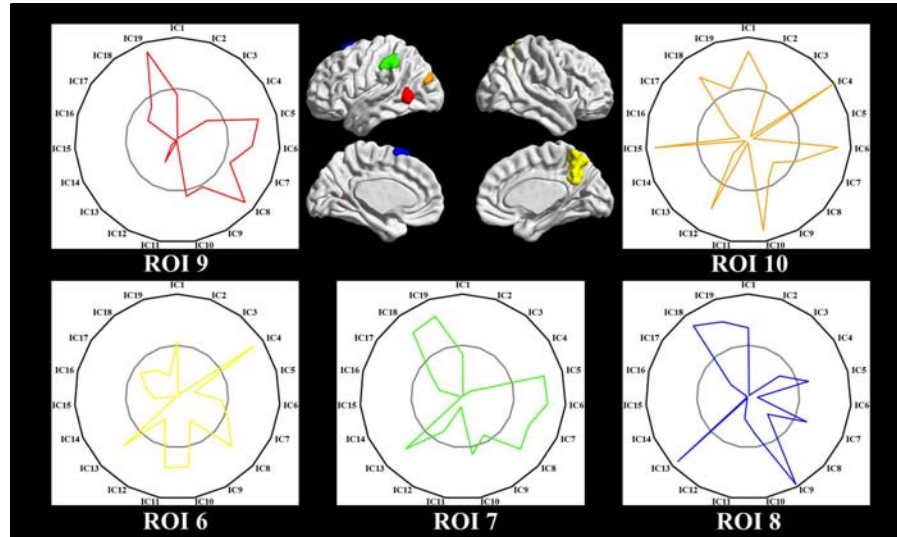

1

2 **Fig 6. The pattern of ICNs-participation for the derived brain regions with high FD values.**

3 The color of the brain region on the surface was corresponding with the color in the

4 fingerprint. We named the brain regions as ROI6 (yellow), ROI7 (green), ROI8 (blue), ROI9

5 (red) and ROI10 (orange). The grey circle in the fingerprint represented the probability of 0.5.

6 The black circle represented the probability of 1.

7

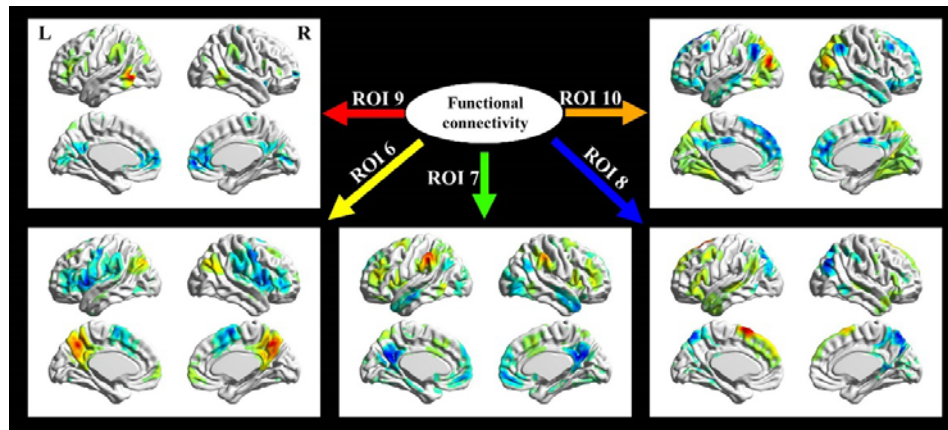

8

9 **Fig 7. The pattern of functional connectivity for the five ROIs with high FD values. One**

10 sample t-test was adopted to test the significance of the functional connectivity with

11 FDR-correction at  $p < 0.001$  and cluster-size  $> 200$  voxels.
